# Supplementary material for: RNA G-Quadruplexes in the model plant species Arabidopsis thaliana: prevalence and possible functional roles
Source: PubMed Central journal article supplement — Nucleic Acids Res. 2010 Sep 21;38(22):8149–63. doi: 10.1093/nar/gkq804 (PMC3001093; doi:10.1093/nar/gkq804), 2010-09-21
Supplement: supp_gkq804_Mullen_Supplemental_Info.pdf [file supp_gkq804_Mullen_Supplemental_Info.pdf]

# Supplemental Information

## RNA G-Quadruplexes in the model plant species *Arabidopsis thaliana*:

### Prevalence and possible functional roles

Melissa A. Mullen<sup>1</sup>, Kalee J. Olson<sup>1,2</sup>, Paul Dallaire<sup>3</sup>, François Major<sup>3</sup>,

Sarah M. Assmann<sup>2\*</sup>, and Philip C. Bevilacqua<sup>1\*</sup>

<sup>1</sup>Department of Chemistry, <sup>2</sup>Department of Biology,

Pennsylvania State University, University Park, Pennsylvania 16802-5302

<sup>3</sup>Institute for Research in Immunology and Cancer (IRIC), Department of Computer Science and Operations Research, Université de Montréal, PO Box 6128, Downtown Station, Montréal, Québec H3C 3J7, Canada

#### Contents:

Figure S1. Native gels of GQS RNA oligonucleotides.

Figure S2.  $G_3L_{1-7}$  GQS density as a function of GC content.

Figure S3. Distribution of  $G_2L_{1-4}$  GQS in the coding sequence.

Table S1. Genome sequence information.

Table S2. Unique gene models with a GQS in the RNA,

Table S4. Full functional analysis of genes with at least one  $G_2L_{1-4}$  GQS present in the RNA.

Table S5. Functional analysis of genes with at least one  $G_2L_{1-2}$  GQS present in the RNA.

Table S6. Functional analysis of genes with at least one  $G_2L_1$  GQS present in the RNA.

Table S7. Functional analysis of genes with at least one  $G_3L_{1-7}$  GQS present in the RNA.

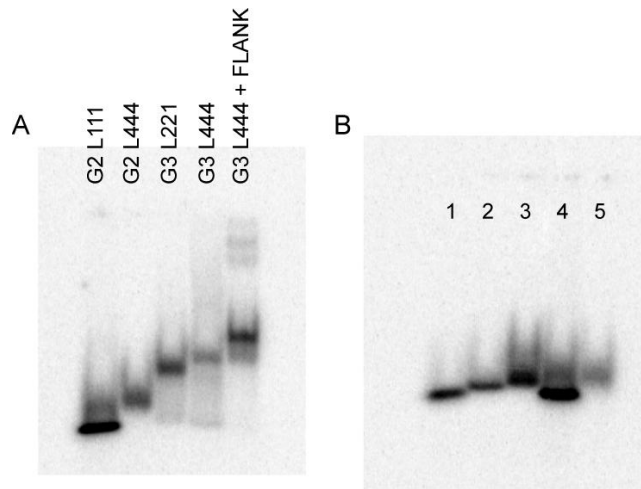

Figure S1. Native gels of GQS RNA oligonucleotides. A. RNA GQS oligonucleotides of interest, renatured identically as for Circular Dichroism samples, and run in 100 mM K<sup>+</sup>. B. RNA GQS 'ladder' oligonucleotides. Lane 1: AG<sub>2</sub>A, Lane 2: A(G<sub>2</sub>A)<sub>2</sub>, Lane 3: A(G<sub>2</sub>A)<sub>3</sub>, Lane 4: A(G<sub>2</sub>A)<sub>4</sub>. Oligonucleotides with increasing numbers of G<sub>2</sub>A repeats until a full GQS is achieved, as indicated by the faster migration of the oligonucleotide (seen in Lane 4). Lane 5: AG<sub>2</sub>AGAAG<sub>2</sub>AG<sub>2</sub>A. Mutant version of the oligonucleotide in lane 4. Disruption of the G pattern disrupts GQS formation, resulting in slower migration.

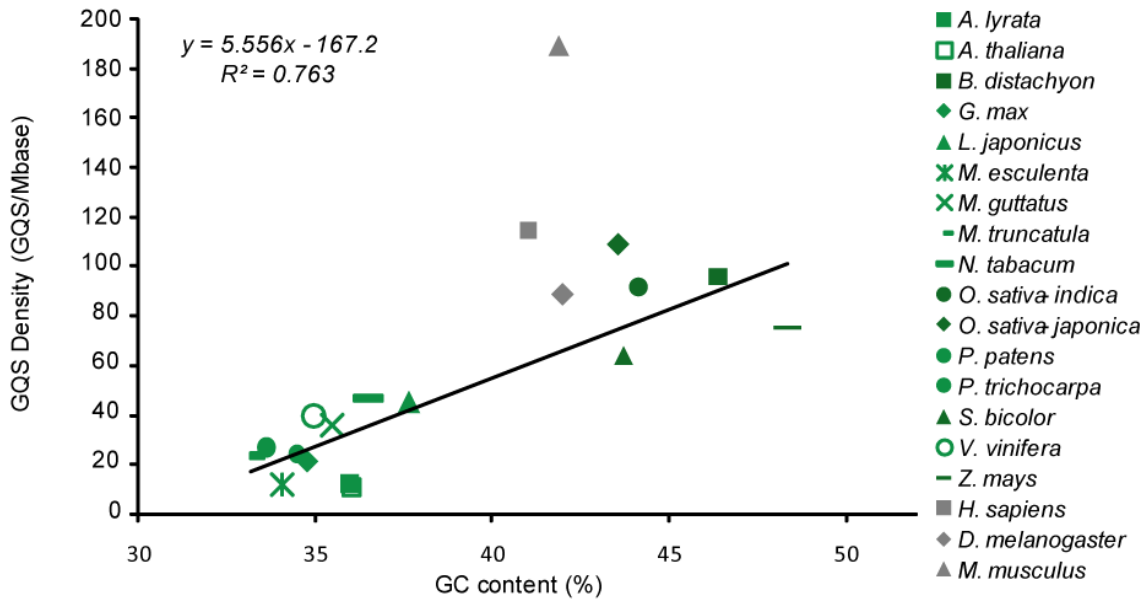

Figure S2. G<sub>3</sub>L<sub>1-7</sub> GQS density as a function of GC content. 15 plant species and 3 non-plant eukaryotes were analyzed. All plant species are in green and fit to a linear regression curve. Non-plant eukaryotes are shown in gray. GC content was determined as described in materials and methods.

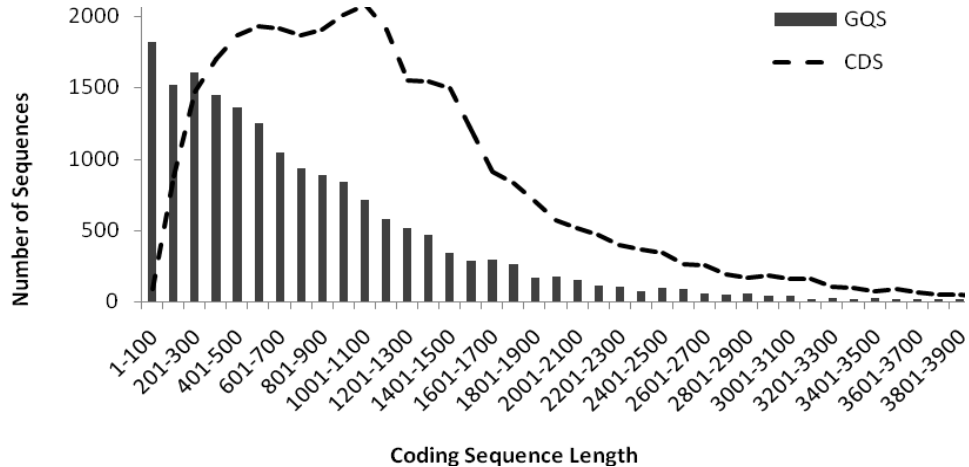

Figure S3. Distribution of G<sub>2</sub>L<sub>1-4</sub> GQS in the coding sequence. The number of GQS starting positions that fall within each 100 nt segment of CDS is shown above with bars. The plot is cropped at a CDS length of 4,000; it incorporates 17,497 GQS out of a total of 17,619 GQS (>99%) that are found in the RNA CDS. The dashed black line represents the distribution of the length of all coding sequences from *Arabidopsis*.

Table S1. Genome sequence information

| Species <sup>a</sup>                   | Common Name <sup>b</sup> | Assembly <sup>c</sup> | Release Date <sup>d</sup> | Server <sup>e</sup>      |
|----------------------------------------|--------------------------|-----------------------|---------------------------|--------------------------|
| <i>Arabidopsis thaliana</i> (57)       | mouseear cress           | TAIR9                 | 06/09                     | <a href="#">TAIR</a>     |
| <i>Arabidopsis lyrata</i>              | lyrate rockcress         | Araly1                | 12/08                     | <a href="#">JGI</a>      |
| <i>Brachypodium distachyon</i> (58)    | a wild grass             | Brachy1.0             | 01/09                     | <a href="#">Ensembl</a>  |
| <i>Drosophila melanogaster</i> (59)    | fruit fly                | BDGP, 5               | 3/06                      | <a href="#">Ensembl</a>  |
| <i>Glycine max</i> (60)                | soybean                  | v 1.0                 | 12/08                     | <a href="#">JGI</a>      |
| <i>Lotus japonicus</i> (61)            | a model legume           | v 1.0                 | 05/09                     | <a href="#">KDRI</a>     |
| <i>Manihot esculenta</i>               | cassava                  | v. 1.0                |                           | <a href="#">JGI</a>      |
| <i>Medicago truncatula</i> (62,63)     | barrelclover             | v 3.0                 | 12/09                     | <a href="#">MSGC</a>     |
| <i>Mimulus guttatus</i>                | seep monkeyflower        | v 1.0                 | 01/10                     | <a href="#">JGI</a>      |
| <i>Mus musculus</i> (64)               | mouse                    | NCBI m37              | 04/07                     | <a href="#">Ensembl</a>  |
| <i>Nicotiana tabacum</i> (65)          | tobacco                  |                       | 11/08                     | <a href="#">PNGG</a>     |
| <i>Oryza sativa – indica</i> (66,67)   | rice – indica            | 2005-01-BGI           | 01/05                     | <a href="#">Ensembl</a>  |
| <i>Oryza sativa – japonica</i> (68,69) | rice - japonica          | MSU6                  | 01/09                     | <a href="#">Ensembl</a>  |
| <i>Populus trichocarpa</i> (70)        | black cottonwood         | JGI2.0                | 12/04                     | <a href="#">Ensembl</a>  |
| <i>Pyscomitrella patens</i> (71)       | moss                     | v 1.1                 | 03/07                     | <a href="#">JGI</a>      |
| <i>Sorghum bicolor</i> (72)            | sorghum                  | Sbi1                  | 12/07                     | <a href="#">Ensembl</a>  |
| <i>Vitis vinifera</i> (73)             | wine grape               | IGGP_12x              | 12/07                     | <a href="#">Ensembl</a>  |
| <i>Zea mays</i> (74)                   | corn                     | AGP1 4a.53            | 03/09                     | <a href="#">MaizeSeq</a> |

Genome sequence information for all downloaded sequences. Provided for each are the <sup>a</sup>official species name, including subspecies for *O. sativa*, <sup>b</sup>accepted common name, <sup>c</sup>genome assembly <sup>d</sup>release date for the assembly, and <sup>e</sup>server where the genomes were obtained. <sup>f</sup>These sequence data were produced by the US Department of Energy Joint Genome Institute (<http://www.jgi.doe.gov>) in collaboration with the user community.

Table S2. Unique gene models with a GQS in the RNA

| GQS Motif                        | Genic              |             | Coding             |             | 5' UTR             |             | 3' UTR             |             | Intron             |             |
|----------------------------------|--------------------|-------------|--------------------|-------------|--------------------|-------------|--------------------|-------------|--------------------|-------------|
|                                  | <i>Gene models</i> | <i>Loci</i> |
| G <sub>3+</sub> L <sub>1-7</sub> | 215                | 177         | 166                | 142         | 10                 | 10          | 14                 | 11          | 26                 | 19          |
| G <sub>3+</sub> L <sub>1-3</sub> | 43                 | 38          | 28                 | 26          | 4                  | 4           | 4                  | 4           | 7                  | 5           |
| G <sub>2+</sub> L <sub>1-4</sub> | 13,156             | 10,382      | 11,816             | 9,699       | 371                | 310         | 588                | 473         | 782                | 630         |
| G <sub>2+</sub> L <sub>1-2</sub> | 4,026              | 3,185       | 3,610              | 2,932       | 119                | 100         | 123                | 102         | 211                | 165         |
| G <sub>2+</sub> L <sub>1</sub>   | 2,428              | 1,913       | 2,190              | 1,781       | 70                 | 60          | 62                 | 54          | 114                | 183         |

Number of unique gene models and loci with at least one GQS. Genic, Coding, 5' UTR, 3' UTR and Intron are defined in Table 4. Quadparser search parameters were set to include G-patterns, which will be found in RNA, and exclude C-patterns. In Arabidopsis, there are 39,640 gene models and 33,518 loci, of which 27,379 are protein coding. The non-coding loci correspond to rRNAs, tRNAs, and other annotated ncRNAs (47). Note that GQS from gene models were used for Tables 1-5.

Table S4. Functional analysis of genes with at least one G<sub>2</sub>L<sub>1-4</sub> GQS present in the RNA

|         | GO ID <sup>a</sup> | GO Cat <sup>b</sup> | GO term <sup>c</sup>                | GQS genes <sup>d</sup> | All genes <sup>e</sup> | % GQS genes <sup>f</sup> | p-value <sup>g</sup> |
|---------|--------------------|---------------------|-------------------------------------|------------------------|------------------------|--------------------------|----------------------|
| overrep | 0003824            | MF                  | catalytic activity                  | 2894 <sup>h</sup>      | 6393 <sup>i</sup>      | 45%                      | 9E-65                |
|         | 0006468            | BP                  | protein aa phosphorylation          | 506                    | 798                    | 63%                      | 1E-53                |
|         | 0016310            | BP                  | phosphorylation                     | 528                    | 852                    | 62%                      | 1E-51                |
|         | 0016740            | MF                  | transferase activity                | 1118                   | 2176                   | 51%                      | 2E-49                |
|         | 0006796            | BP                  | phosphate metabolic process         | 543                    | 894                    | 61%                      | 2E-29                |
|         | 0006793            | BP                  | phosphorus metabolic process        | 543                    | 895                    | 61%                      | 3E-49                |
|         | 0016301            | MF                  | kinase activity                     | 661                    | 1151                   | 57%                      | 2E-48                |
|         | 0043687            | BP                  | post-translational protein mod.     | 579                    | 985                    | 59%                      | 2E-46                |
|         | 0016772            | MF                  | transferase act, phos. groups       | 708                    | 1284                   | 55%                      | 2E-43                |
|         | 0006464            | BP                  | protein modification process        | 612                    | 1107                   | 55%                      | 1E-37                |
|         | 0043412            | BP                  | biopolymer modification             | 639                    | 1229                   | 52%                      | 7E-29                |
|         | 0005524            | MF                  | ATP binding                         | 337                    | 607                    | 56%                      | 2E-20                |
|         | 0032559            | MF                  | adenyl ribonucleotide binding       | 339                    | 613                    | 55%                      | 3E-20                |
|         | 0030554            | MF                  | adenyl nucleotide binding           | 351                    | 642                    | 55%                      | 7E-20                |
|         | 0005478            | MF                  | transporter activity                | 504                    | 993                    | 51%                      | 1E-19                |
|         | 0032501            | BP                  | multicellular organismal process    | 462                    | 906                    | 51%                      | 2E-18                |
|         | 0017111            | MF                  | nucleoside-triphosphatase act.      | 237                    | 408                    | 58%                      | 2E-17                |
|         | 0000166            | MF                  | nucleotide binding                  | 490                    | 980                    | 50%                      | 2E-17                |
|         | 0048856            | BP                  | anatomical structure dev.           | 359                    | 681                    | 53%                      | 5E-17                |
|         | 0032502            | BP                  | developmental process               | 493                    | 992                    | 50%                      | 6E-17                |
|         | 0007275            | BP                  | multicellular organismal dev.       | 441                    | 871                    | 51%                      | 7E-17                |
|         | 0015646            | MF                  | transmembrane transporter act.      | 366                    | 701                    | 52%                      | 2E-16                |
|         | 0032555            | MF                  | purine ribonucleotide binding       | 387                    | 751                    | 52%                      | 3E-16                |
|         | 0032443            | MF                  | ribonucleotide binding              | 387                    | 751                    | 52%                      | 3E-16                |
|         | 0016020            | CC                  | membrane                            | 1011                   | 2266                   | 45%                      | 3E-16                |
|         | 0017076            | MF                  | purine nucleotide binding           | 399                    | 781                    | 51%                      | 4E-16                |
|         | 0016817            | MF                  | hydrolase act, on acid anhydrides   | 244                    | 432                    | 57%                      | 5E-16                |
|         | 0016818            | MF                  | hydrolase act, acid anhyd. wit h P  | 243                    | 431                    | 56%                      | 7E-16                |
|         | 0016462            | MF                  | pyrophosphatase activity            | 242                    | 429                    | 56%                      | 7E-16                |
|         | 0022804            | MF                  | active transmem. transporter act.   | 241                    | 427                    | 56%                      | 7E-16                |
|         | 0022414            | BP                  | reproductive process                | 275                    | 502                    | 55%                      | 8E-16                |
|         | 0043227            | CC                  | membrane-bound organelle            | 1929                   | 4637                   | 42%                      | 1E-15                |
|         | 0050876            | BP                  | reproduction                        | 277                    | 509                    | 54%                      | 2E-15                |
|         | 0043231            | CC                  | intracell. mem-bound organelle      | 1924                   | 4630                   | 42%                      | 2E-15                |
|         | 0016887            | MF                  | ATPase activity                     | 183                    | 312                    | 59%                      | 4E-14                |
|         | 0043226            | CC                  | organelle                           | 2092                   | 5111                   | 41%                      | 1E-13                |
|         | 0043229            | CC                  | intracellular organelle             | 2091                   | 5110                   | 41%                      | 1E-13                |
|         | 0042623            | MF                  | ATPase activity, coupled            | 134                    | 214                    | 63%                      | 3E-13                |
|         | 0044424            | CC                  | intracellular part                  | 2331                   | 5754                   | 41%                      | 3E-13                |
|         | 0005622            | CC                  | intracellular                       | 2477                   | 6146                   | 40%                      | 3E-13                |
|         | 0016787            | MF                  | hydrolase activity                  | 975                    | 2231                   | 44%                      | 7E-13                |
|         | 0004386            | MF                  | helicase activity                   | 88                     | 126                    | 70%                      | 1E-12                |
|         | 0044464            | CC                  | cell part                           | 4378                   | 11331                  | 39%                      | 3E-12                |
|         | 0005623            | CC                  | cell                                | 4378                   | 11331                  | 39%                      | 3E-12                |
|         | 0003006            | BP                  | reproductive dev. process           | 226                    | 420                    | 54%                      | 6E-12                |
|         | 0048608            | BP                  | reproductive structure dev.         | 226                    | 420                    | 54%                      | 6E-12                |
|         | 0051234            | BP                  | establishment of localization       | 588                    | 1279                   | 46%                      | 6E-12                |
|         | 0022892            | MF                  | substrate-specific transporter act. | 328                    | 657                    | 50%                      | 1E-11                |
|         | 0051179            | BP                  | localization                        | 592                    | 1294                   | 46%                      | 1E-11                |
|         | 0006810            | BP                  | transport                           | 583                    | 1273                   | 46%                      | 2E-11                |
|         | 0048731            | BP                  | system development                  | 190                    | 348                    | 55%                      | 9E-11                |

|         |    |                                                    |      |       |     |       |
|---------|----|----------------------------------------------------|------|-------|-----|-------|
| 0048513 | BP | organ development                                  | 190  | 348   | 55% | 9E-11 |
| 0015290 | MF | secondary active transmembrane transporter act.    | 126  | 212   | 60% | 3E-10 |
| 0022891 | MF | substrate-specific transmembrane transporter act.  | 271  | 537   | 51% | 3E-10 |
| 0008026 | MF | ATP-dependent helicase activity                    | 56   | 76    | 74% | 2E-9  |
| 0009857 | BP | recog or rejection of self pollen                  | 29   | 31    | 94% | 2E-9  |
| 0008151 | BP | cellular process                                   | 2642 | 6706  | 39% | 3E-9  |
| 0009791 | BP | post-embryonic development                         | 152  | 275   | 55% | 4E-9  |
| 0008037 | BP | cell recognition                                   | 29   | 32    | 91% | 1E-8  |
| 0015075 | MF | ion transmem. transporter act.                     | 201  | 392   | 51% | 3E-8  |
| 0050222 | MF | protein kinase activity                            | 225  | 448   | 50% | 3E-8  |
| 005169  | BP | response to stimulus                               | 854  | 2016  | 42% | 6E-8  |
| 0005737 | CC | cytoplasm                                          | 1671 | 4157  | 40% | 9E-8  |
| 0009875 | BP | pollen-pistil interaction                          | 29   | 34    | 85% | 3E-7  |
| 0044444 | CC | cytoplasmic part                                   | 1542 | 3831  | 40% | 3E-7  |
| 0016773 | MF | phosphotransferase act., alcohol group as acceptor | 262  | 546   | 48% | 4E-7  |
| 0008152 | BP | metabolic process                                  | 2446 | 6261  | 39% | 8E-7  |
| 0009790 | BP | embryonic development                              | 145  | 277   | 52% | 1E-6  |
| 0003674 | MF | molecular function                                 | 8070 | 21958 | 37% | 2E-6  |
| 0016932 | MF | transferase act., transferring glycosyl groups     | 195  | 395   | 50% | 2E-6  |
| 0006950 | BP | response to stress                                 | 526  | 1210  | 44% | 2E-6  |
| 0015293 | MF | symporter activity                                 | 61   | 96    | 64% | 2E-6  |
| 0003677 | MF | DNA binding                                        | 717  | 1699  | 42% | 3E-6  |
| 0050791 | BP | regulation of biological process                   | 891  | 2149  | 42% | 3E-6  |
| 0048519 | BP | negative reg. of biological process                | 80   | 136   | 59% | 3E-6  |
| 0015294 | MF | solute:cation symporter activity                   | 60   | 95    | 63% | 4E-6  |
| 0005634 | CC | nucleus                                            | 642  | 1510  | 43% | 4E-6  |
| 0065007 | BP | biological regulation                              | 955  | 2320  | 41% | 4E-6  |
| 0048316 | BP | seed development                                   | 144  | 280   | 51% | 5E-6  |
| 0005402 | MF | cation:sugar symporter activity                    | 49   | 74    | 66% | 6E-6  |
| 0005403 | MF | sugar:hydrogen symporter act.                      | 49   | 74    | 66% | 6E-6  |
| 0015295 | MF | solute:hydrogen symporter act.                     | 49   | 74    | 66% | 6E-6  |
| 0046527 | MF | glucosyltransferase activity                       | 55   | 86    | 64% | 6E-6  |
| 0051119 | MF | sugar transmem. transporter act.                   | 54   | 85    | 64% | 6E-6  |
| 0009793 | BP | embryonic development ending in seed dormancy      | 133  | 256   | 52% | 6E-6  |
| 0051706 | BP | multi-organism process                             | 180  | 367   | 49% | 1E-5  |
| 0005515 | MF | protein binding                                    | 778  | 1873  | 42% | 1E-5  |
| 0009628 | BP | response to abiotic stimulus                       | 279  | 607   | 46% | 1E-5  |
| 0048523 | BP | negative reg. of cellular process                  | 59   | 96    | 62% | 2E-5  |
| 0015144 | MF | carbohydrate transmembrane transporter activity    | 58   | 94    | 62  | 2E-5  |
| 0008324 | MF | cation transmem. transporter act.                  | 151  | 302   | 50% | 2E-5  |
| 0005200 | CC | struc. constituent of cytoskeleton                 | 22   | 26    | 85% | 2E-5  |
| 0044425 | CC | membrane part                                      | 406  | 926   | 44% | 2E-5  |
| 0006952 | BP | defense response                                   | 233  | 49    | 47% | 3E-5  |
| 0048409 | BP | flower development                                 | 68   | 116   | 59% | 3E-5  |
| 0051244 | BP | regulation of cellular process                     | 830  | 2018  | 41% | 3E-5  |
| 0016820 | MF | hydrolase activity, acting on acid anhydrides...   | 72   | 125   | 58% | 3E-5  |
| 0009536 | CC | plastid                                            | 800  | 1941  | 41% | 3E-5  |
| 0044238 | BP | primary metabolic process                          | 2011 | 5159  | 39% | 4E-5  |

|          |         |    |                                                    |      |      |       |        |
|----------|---------|----|----------------------------------------------------|------|------|-------|--------|
|          | 0043492 | MF | ATPase activity, coupled to movement of substances | 71   | 124  | 58%   | 5E-5   |
|          | 0042626 | MF | ATPase activity, coupled to transmembrane movement | 71   | 124  | 58%   | 5E-5   |
|          | 0044237 | BP | cellular metabolic process                         | 1994 | 5120 | 39%   | 5E-5   |
|          | 0044459 | CC | plasma membrane part                               | 60   | 101  | 59%   | 6E-5   |
|          | 0030246 | MF | carbohydrate binding                               | 63   | 108  | 58%   | 7E-5   |
|          | 0006855 | BP | multidrug transport                                | 35   | 51   | 69%   | 8E-5   |
|          | 0008238 | MF | exopeptidase activity                              | 49   | 79   | 62%   | 9E-5   |
|          | 0050973 | BP | reg. of developmental process                      | 90   | 168  | 54%   | 9E-5   |
| underrep | 0000496 | MF | base pairing                                       | 0    | 631  | 0%    | <1E-99 |
|          | 0000498 | MF | base pairing with RNA                              | 0    | 631  | 0%    | <1E-99 |
|          | 0000499 | MF | base pairing with mRNA                             | 0    | 631  | 0%    | <1E-99 |
|          | 0060090 | MF | molecular adaptor activity                         | 0    | 631  | 0%    | <1E-99 |
|          | 0030533 | MF | triplet codon-AA adaptor activity                  | 0    | 631  | 0%    | <1E-99 |
|          | 0006455 | BP | translational elongation                           | 18   | 662  | 0%    | 4E-98  |
|          | 0043284 | BP | biopolymer biosynthetic process                    | 103  | 874  | 12%   | 6E-59  |
|          | 0006412 | BP | translation                                        | 174  | 1129 | 15%   | 4E-51  |
|          | 0010467 | BP | gene expression                                    | 293  | 1487 | 20%   | 1E-41  |
|          | 0009059 | BP | macromolecule biosynth. process                    | 280  | 1399 | 20%   | 7E-39  |
|          | 0003723 | MF | RNA binding                                        | 179  | 983  | 18%   | 7E-30  |
|          | 0044249 | MF | cellular biosynthetic process                      | 429  | 1719 | 25%   | 3E-22  |
|          | 0009058 | BP | biosynthetic process                               | 602  | 2149 | 28%   | 2E-14  |
|          | 0000154 | BP | rRNA modification                                  | 1    | 70   | 0.01% | 3E-9   |
|          | 0048046 | CC | apoplast                                           | 8    | 102  | 8%    | 1E-8   |
|          | 0005732 | CC | small nucleolar ribonucleoprotein complex          | 8    | 94   | 9%    | 2E-7   |
|          | 0005576 | CC | extracellular region                               | 28   | 172  | 16%   | 2E-6   |

Provided are <sup>a</sup>overrepresented and underrepresented gene ontology (GO) ID numbers, <sup>b</sup>GO categories (Cat), and <sup>c</sup>GO term for gene products encoded by transcripts with at least one G<sub>2+L1-4</sub> GQS. Included are <sup>d</sup>the number of genes (CDS, 5'UTR, 3'UTR, and introns) with a GQS that are annotated for the listed GO term, and <sup>e</sup>the total number of genes in Arabidopsis with the listed GO term. Also included are <sup>f</sup>the percentage of genes with GQS with a given GO term and <sup>g</sup>the appropriate p-value, as determined using the BiNGO program. <sup>h</sup>The total number of GO-annotated genes with a GQS in G<sub>2L1-4</sub> is 9,097. <sup>i</sup>The total number of GO-annotated genes in *A. thaliana* is 25,179. Table is sorted in order of increasing p-value. Some GO terms are sub-categories of others.

Table S5. Functional analysis of genes with at least one G<sub>2</sub>L<sub>1-2</sub> GQS present in the RNA

|          | GO ID <sup>a</sup> | GO Cat <sup>b</sup>                                   | GO term <sup>c</sup>                                             | GQS genes <sup>d</sup> | All genes <sup>e</sup> | % GQS genes <sup>f</sup> | p-value <sup>g</sup> |
|----------|--------------------|-------------------------------------------------------|------------------------------------------------------------------|------------------------|------------------------|--------------------------|----------------------|
| overrep  | 0003677            | MF                                                    | DNA binding                                                      | 297 <sup>h</sup>       | 1699 <sup>i</sup>      | 17%                      | 1E-12                |
|          | 0030528            | BP                                                    | transcription regulator activity                                 | 247                    | 1441                   | 17%                      | 2E-9                 |
|          | 0019219            | BP                                                    | reg. of nucleobase, nucleoside, & nucleic acid metabolic process | 202                    | 1153                   | 18%                      | 2E-8                 |
|          | 0050791            | BP                                                    | regulation of biological process                                 | 335                    | 2149                   | 16%                      | 3E-8                 |
|          | 0003700            | BP                                                    | transcription factor activity                                    | 208                    | 1207                   | 17%                      | 3E-8                 |
|          | 0009889            | BP                                                    | regulation of biosynthetic process                               | 202                    | 1164                   | 17%                      | 3E-8                 |
|          | 0045449            | BP                                                    | regulation of transcription                                      | 198                    | 1139                   | 17%                      | 3E-8                 |
|          | 0004386            | MF                                                    | helicase activity                                                | 41                     | 126                    | 33%                      | 3E-8                 |
|          | 0031323            | BP                                                    | reg. of cellular metabolic process                               | 208                    | 1216                   | 17%                      | 3E-8                 |
|          | 0010556            | BP                                                    | reg. of macromolecule biosynthetic process                       | 199                    | 1152                   | 17%                      | 3E-8                 |
|          | 0051244            | BP                                                    | regulation of cellular process                                   | 315                    | 2018                   | 16%                      | 3E-8                 |
|          | 0010468            | BP                                                    | regulation of gene expression                                    | 209                    | 1232                   | 17%                      | 5E-8                 |
|          | 0043227            | CC                                                    | membrane-bounded organelle                                       | 641                    | 4636                   | 14%                      | 5E-8                 |
|          | 0060255            | BP                                                    | regulation of macromolecule metabolic process                    | 200                    | 1171                   | 17%                      | 6E-8                 |
|          | 0043231            | CC                                                    | intracell mem-bounded organelle                                  | 639                    | 4629                   | 14%                      | 6E-8                 |
|          | 0019222            | BP                                                    | regulation of metabolic process                                  | 209                    | 1238                   | 17%                      | 6E-8                 |
|          | 0065007            | BP                                                    | biological regulation                                            | 350                    | 2320                   | 15%                      | 1E-7                 |
|          | 0032501            | BP                                                    | multicellular organismal process                                 | 159                    | 906                    | 18%                      | 5E-7                 |
|          | 0008026            | MF                                                    | ATP-dependent helicase activity                                  | 28                     | 76                     | 37%                      | 5E-7                 |
|          | 0005622            | CC                                                    | intracellular                                                    | 809                    | 6145                   | 13%                      | 1E-6                 |
|          | 0043229            | CC                                                    | intracellular organelle                                          | 685                    | 5109                   | 13%                      | 1E-6                 |
|          | 0043226            | CC                                                    | organelle                                                        | 685                    | 5110                   | 13%                      | 1E-6                 |
|          | 0016887            | MF                                                    | ATPase activity                                                  | 69                     | 312                    | 22%                      | 2E-6                 |
|          | 0007275            | BP                                                    | multicellular organismal dev                                     | 151                    | 871                    | 17%                      | 2E-6                 |
|          | 0005634            | CC                                                    | nucleus                                                          | 236                    | 1510                   | 16%                      | 3E-6                 |
|          | 0044424            | CC                                                    | intracellular part                                               | 752                    | 5753                   | 13%                      | 1E-5                 |
|          | 0051234            | BP                                                    | establishment of localization                                    | 202                    | 1279                   | 16%                      | 1E-5                 |
|          | 0006810            | BP                                                    | transport                                                        | 201                    | 1273                   | 16%                      | 2E-5                 |
|          | 0048856            | BP                                                    | anatomical structure dev.                                        | 120                    | 681                    | 18%                      | 2E-5                 |
|          | 0051179            | BP                                                    | localization                                                     | 203                    | 1294                   | 16%                      | 2E-5                 |
|          | 0042623            | MF                                                    | ATPase activity, coupled                                         | 50                     | 214                    | 23%                      | 2E-5                 |
|          | 0003676            | MF                                                    | nucleic acid binding                                             | 428                    | 3078                   | 14%                      | 2E-5                 |
|          | 0017111            | MF                                                    | nucleoside-triphosphate activity                                 | 80                     | 408                    | 20%                      | 3E-5                 |
| 0005488  | MF                 | binding                                               | 881                                                              | 6895                   | 13%                    | 3E-5                     |                      |
| 0032502  | BP                 | developmental process                                 | 161                                                              | 992                    | 16%                    | 4E-5                     |                      |
| 0001681  | MF                 | hydrolase act, acting on p-containing acid anhydrides | 2                                                                | 431                    | 0.5%                   | 6E-5                     |                      |
| 0016817  | MF                 | hydrolase act, acting on acid anhydrides              | 82                                                               | 432                    | 19%                    | 7E-5                     |                      |
| 0016462  | MF                 | pyrophosphatase activity                              | 81                                                               | 429                    | 19%                    | 9E-5                     |                      |
| underrep | 0000496            | MF                                                    | base pairing                                                     | 0                      | 631                    | 0%                       | 1E-30                |
|          | 0000498            | MF                                                    | base pairing with RNA                                            | 0                      | 631                    | 0%                       | 1E-30                |
|          | 0000499            | MF                                                    | base pairing with mRNA                                           | 0                      | 631                    | 0%                       | 1E-30                |
|          | 0030533            | MF                                                    | triplet codon-AA adaptor activity                                | 0                      | 631                    | 0%                       | 1E-30                |
|          | 0060090            | MF                                                    | molecular adaptor activity                                       | 0                      | 631                    | 0%                       | 1E-30                |
|          | 0006455            | BP                                                    | translational elongation                                         | 13                     | 662                    | 2%                       | 5E-17                |



|         |    |                                 |     |      |    |       |
|---------|----|---------------------------------|-----|------|----|-------|
| 0006416 | BP | translation                     | 53  | 1129 | 5% | 3E-12 |
| 0043284 | BP | biopolymer biosynthetic process | 38  | 874  | 4% | 2E-10 |
| 0010467 | BP | gene expression                 | 89  | 1487 | 6% | 6E-10 |
| 0044249 | BP | cellular biosynthetic process   | 109 | 1719 | 6% | 6E-10 |
| 0009059 | BP | macromolecule biosynth. process | 82  | 1399 | 6% | 7E-10 |
| 0012505 | CC | endomembrane system             | 316 | 3859 | 8% | 9E-9  |
| 0009058 | BP | biosynthetic process            | 154 | 2149 | 7% | 2E-8  |

Provided are <sup>a</sup>overrepresented and underrepresented gene ontology (GO) ID numbers, <sup>b</sup>GO categories (Cat), and <sup>c</sup>GO term for gene products encoded by transcripts with at least one G<sub>2+L1-4</sub> GQS. Included are <sup>d</sup>the number of genes (CDS, 5'UTR, 3'UTR, and introns) with a GQS that are annotated for the listed GO term, and <sup>e</sup>the total number of genes in Arabidopsis with the listed GO term. Also included are <sup>f</sup>the percentage of genes with GQS with a given GO term and <sup>g</sup>the appropriate p-value, as determined using the BiNGO program. <sup>h</sup>The total number of GO-annotated genes with a GQS in G<sub>2L1-4</sub> is 2,811. <sup>i</sup>The total number of GO-annotated genes in *A. thaliana* is 25,179. Table is sorted in order of increasing p-value. Some GO terms are sub-categories of others.

Table S6. Functional analysis of genes with at least one G<sub>2</sub>L<sub>1</sub> GQS present in the RNA

|         | GO ID <sup>a</sup> | GO Cat <sup>b</sup> | GO term <sup>c</sup>                                             | GQS genes <sup>d</sup>           | All genes <sup>e</sup> | % GQS genes <sup>f</sup> | p-value <sup>g</sup> |       |
|---------|--------------------|---------------------|------------------------------------------------------------------|----------------------------------|------------------------|--------------------------|----------------------|-------|
| overrep | 0030528            | BP                  | transcription regulator activity                                 | 191 <sup>h</sup>                 | 1441 <sup>i</sup>      | 13%                      | 8E-17                |       |
|         | 0003677            | MF                  | DNA binding                                                      | 214                              | 1699                   | 13%                      | 9E-17                |       |
|         | 0003700            | MF                  | transcription factor activity                                    | 161                              | 1207                   | 13%                      | 2E-14                |       |
|         | 0019219            | BP                  | reg. of nucleobase, nucleoside, & nucleic acid metabolic process | 150                              | 1153                   | 13%                      | 1E-12                |       |
|         | 0009889            | BP                  | regulation of biosynthetic process                               | 151                              | 1164                   | 13%                      | 1E-12                |       |
|         | 0045449            | BP                  | regulation of transcription                                      | 148                              | 1139                   | 13%                      | 2E-12                |       |
|         | 0031323            | BP                  | reg. of cellular metabolic process                               | 154                              | 1216                   | 13%                      | 4E-12                |       |
|         | 0010556            | BP                  | reg. of macromolecule biosynthetic process                       | 148                              | 1152                   | 13%                      | 4E-12                |       |
|         | 0019222            | BP                  | regulation of metabolic process                                  | 155                              | 1238                   | 13%                      | 6E-12                |       |
|         | 0003676            | MF                  | nucleic acid binding                                             | 311                              | 3078                   | 10%                      | 6E-12                |       |
|         | 0060255            | BP                  | regulation of macromolecule metabolic process                    | 148                              | 1171                   | 13%                      | 9E-12                |       |
|         | 0010468            | BP                  | regulation of gene expression                                    | 152                              | 1232                   | 12%                      | 3E-11                |       |
|         | 0050791            | BP                  | regulation of biological process                                 | 230                              | 2149                   | 11%                      | 7E-11                |       |
|         | 0051244            | BP                  | regulation of cellular process                                   | 218                              | 2018                   | 11%                      | 1E-10                |       |
|         | 0065007            | BP                  | biological regulation                                            | 236                              | 2320                   | 10%                      | 5E-9                 |       |
|         | 0005488            | MF                  | binding                                                          | 579                              | 6895                   | 8%                       | 2E-8                 |       |
|         | 0005634            | CC                  | nucleus                                                          | 151                              | 1510                   | 10%                      | 6E-5                 |       |
|         | underrep           | 0060528             | MF                                                               | transcription regulator activity | 191                    | 1441                     | 13%                  | 8E-17 |
|         |                    | 0003677             | MF                                                               | DNA binding                      | 214                    | 1699                     | 13%                  | 9E-17 |
|         |                    | 0003700             | MF                                                               | transcription factor activity    | 161                    | 1207                     | 13%                  | 1E-14 |
| 0019219 |                    | BP                  | regulation of nucleobase... and nucleic acid metabolic process   | 150                              | 1153                   | 13%                      | 1E-12                |       |
| 0009889 |                    | BP                  | regulation of biosynthetic process                               | 151                              | 1164                   | 13%                      | 1E-12                |       |
| 0045449 |                    | BP                  | regulation of transcription                                      | 148                              | 1139                   | 13%                      | 2E-12                |       |
| 0031323 |                    | BP                  | reg. of cellular metabolic process                               | 154                              | 1216                   | 13%                      | 3E-12                |       |
| 0010556 |                    | BP                  | reg. of macromolecule biosynthetic process                       | 148                              | 1152                   | 13%                      | 3E-12                |       |
| 0019222 |                    | BP                  | regulation of metabolic process                                  | 155                              | 1238                   | 13%                      | 6E-12                |       |
| 0003676 |                    | MF                  | nucleic acid binding                                             | 311                              | 3078                   | 10%                      | 6E-12                |       |
| 0060255 |                    | BP                  | regulation of macromolecule metabolic process                    | 148                              | 1171                   | 13%                      | 9E-12                |       |
| 0010468 |                    | BP                  | regulation of gene expression                                    | 152                              | 1232                   | 12%                      | 3E-11                |       |
| 0050791 |                    | BP                  | regulation of biological process                                 | 230                              | 2149                   | 11%                      | 7E-11                |       |
| 0051244 |                    | BP                  | regulation of cellular process                                   | 218                              | 2018                   | 11%                      | 1E-10                |       |
| 0065007 |                    | BP                  | biological regulation                                            | 236                              | 2320                   | 10%                      | 5E-9                 |       |
| 0005488 |                    | MF                  | binding                                                          | 59                               | 6895                   | 8%                       | 2E-8                 |       |
| 0006534 |                    | CC                  | nucleus                                                          | 151                              | 1510                   | 10%                      | 6E-5                 |       |

Provided are <sup>a</sup>overrepresented and underrepresented gene ontology (GO) ID numbers, <sup>b</sup>GO categories (Cat), and <sup>c</sup>GO term for gene products encoded by transcripts with at least one G<sub>2</sub>+L<sub>1-4</sub> GQS. Included are <sup>d</sup>the number of genes (CDS, 5'UTR, 3'UTR, and introns) with a GQS that are annotated for the listed GO term, and <sup>e</sup>the total number of genes in Arabidopsis with the listed GO term. Also included are <sup>f</sup>the percentage of genes with GQS with a given GO term and <sup>g</sup>the appropriate p-value, as determined using the BiNGO program. <sup>h</sup>The total number of GO-annotated genes with a GQS in G<sub>2</sub>L<sub>1-4</sub> is 1,697. <sup>i</sup>The total number of GO-annotated genes in *A. thaliana* is 25,179. Table is sorted in order of increasing p-value. Some GO terms are sub-categories of others.

Table S7. Functional analysis of genes with at least one G<sub>3</sub>L<sub>1-7</sub> GQS present in the RNA

|          | GO ID <sup>a</sup> | GO Cat <sup>b</sup> | GO term <sup>c</sup>           | GQS genes <sup>d</sup> | All genes <sup>e</sup> | % GQS genes <sup>f</sup> | p-value <sup>g</sup> |
|----------|--------------------|---------------------|--------------------------------|------------------------|------------------------|--------------------------|----------------------|
| overrep  | 0005507            | MF                  | copper ion binding             | 9 <sup>h</sup>         | 109 <sup>i</sup>       | 8%                       | 8.8E-4               |
|          | 0009790            | BP                  | embryonic development          | 11                     | 277                    | 4%                       | 3.3E-2               |
|          | 0007275            | BP                  | multicellular organismal dev.  | 20                     | 871                    | 2%                       | 8.8E-2               |
| underrep | 0009059            | BP                  | macromolecule biosynth process | 0                      | 1399                   | 0                        | 3.7E-3               |
|          | 0009058            | BP                  | biosynthetic process           | 3                      | 2149                   | 0.1%                     | 3.7E-3               |
|          | 0010467            | BP                  | gene expression                | 1                      | 1487                   | 0.1%                     | 1.2E-2               |
|          | 0044249            | BP                  | cellular biosynthetic process  | 2                      | 1719                   | 0.1%                     | 1.2E-2               |
|          | 0006416            | BP                  | translation                    | 0                      | 1129                   | 0                        | 1.9E-2               |

Provided are <sup>a</sup>overrepresented and underrepresented gene ontology (GO) ID numbers, <sup>b</sup>GO categories (Cat), and <sup>c</sup>GO term for gene products encoded by transcripts with at least one G<sub>2+L1-4</sub> GQS. Included are <sup>d</sup>the number of genes (CDS, 5'UTR, 3'UTR, and introns) with a GQS that are annotated for the listed GO term, and <sup>e</sup>the total number of genes in Arabidopsis with the listed GO term. Also included are <sup>f</sup>the percentage of genes with GQS with a given GO term and <sup>g</sup>the appropriate p-value, as determined using the BiNGO program. <sup>h</sup>The total number of GO-annotated genes with a GQS in G<sub>2</sub>L<sub>1-4</sub> is 246. <sup>i</sup>The total number of GO-annotated genes in *A. thaliana* is 25,179. Table is sorted in order of increasing p-value. Some GO terms are sub-categories of others.
